# Supplementary material
Source: publisher figshare collection journal article supplement (https://acs.figshare.com/ndownloader/files/12482252)
Supplement: Supplementary file 1 [file 12482252]

# Polydopamine Nanoparticles as Efficient Scavengers for Reactive Oxygen Species in Periodontal Disease

*Xingfu Bao,<sup>†,‡</sup> Jiahui Zhao,<sup>†,§</sup> Jian Sun,<sup>†</sup> Min Hu,<sup>‡</sup> and Xiurong Yang<sup>\*,†</sup>*

<sup>†</sup> State Key Laboratory of Electroanalytical Chemistry, Changchun Institute of Applied Chemistry,  
Chinese Academy of Sciences, Changchun, Jilin 130022, China

<sup>‡</sup> School of Stomatology, Jilin University, Changchun 130021, China

<sup>§</sup> University of Chinese Academy of Sciences, Beijing 100049, China

E-mail: xryang@ciac.ac.cn

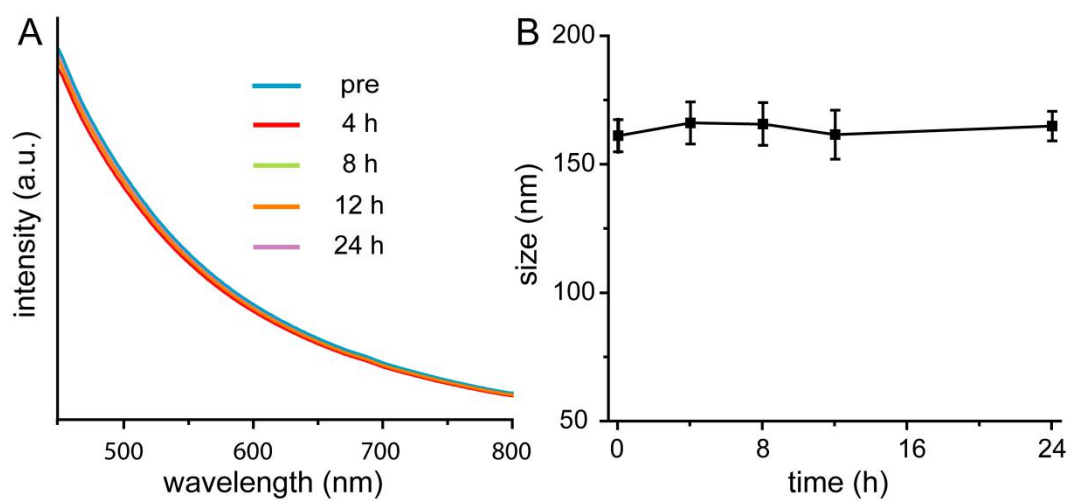

**Figure S1.** Time-dependent (A) UV-vis absorbance spectra and (B) size changes of PDA NPs in 0.9% NaCl solution over 1 d.

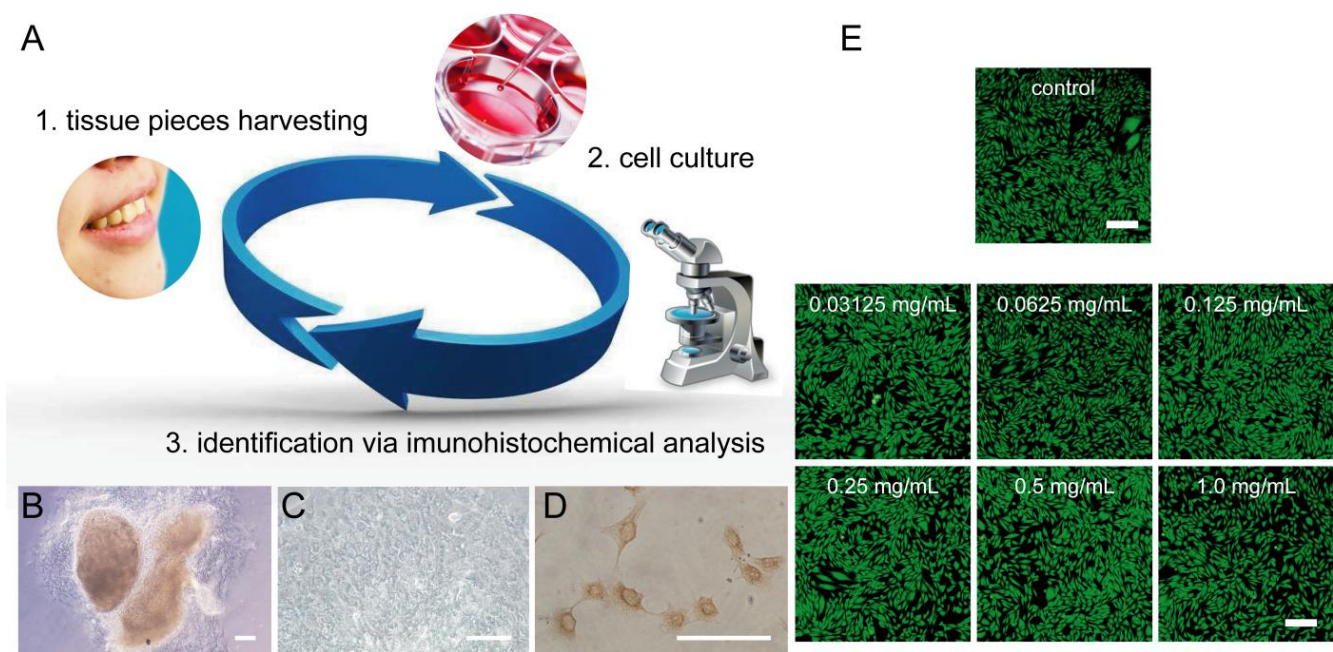

**Figure S2.** (A) Schematic illustration of the achievement and identification of HGE cells (A). Images of (B) tissue pieces 2 weeks after the harvesting from patients, (C) the attachment and spread of HGE cells (C) and (D) HGE cells with positive cytokeratin staining. (E) Enlarged images of Figure 2B and inset of Figure 2A. Scale bars were equal to 100  $\mu$ m.

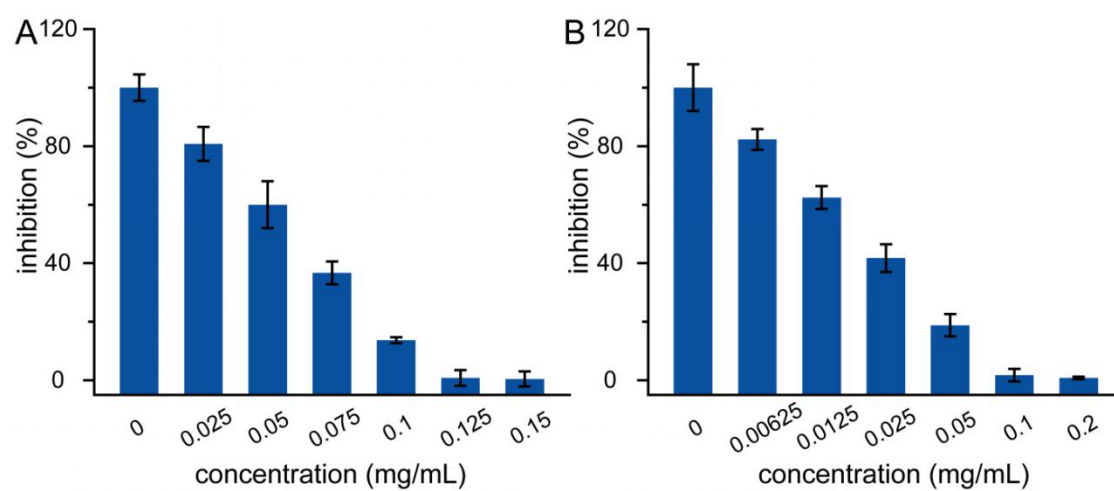

**Figure S3.** Concentration-dependent inhibitions of (A)  $\text{HO}\cdot$  and (B)  $\text{O}_2^{\cdot-}$  via PDA NPs.

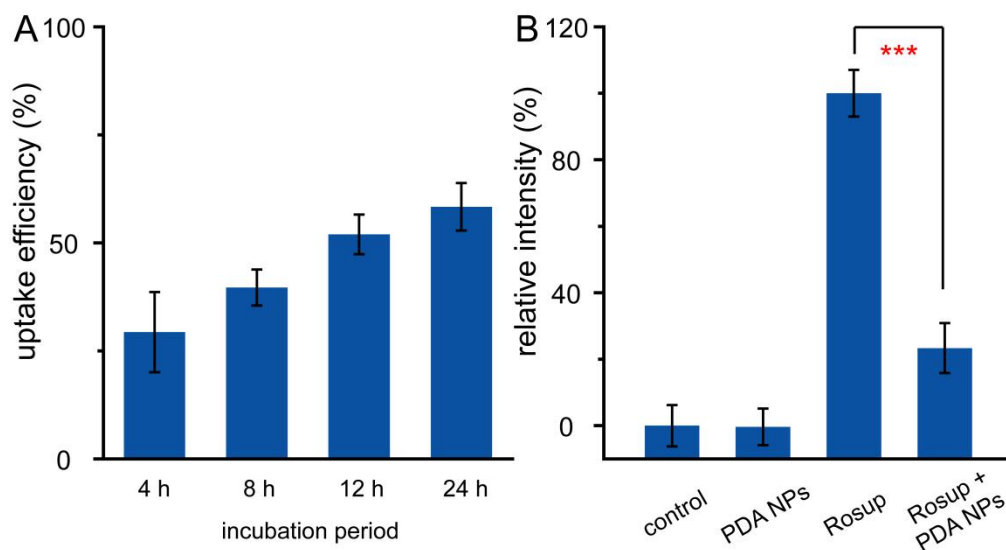

**Figure S4.** (A) Uptake kinetics of HGE cells toward  $\text{Cu}^{2+}$ -modified PDA NPs. (B) Flow cytometry-based quantitative results of PDA NPs as ROS scavengers in HGE cells. Fluorescence intensities of the Rosup-treated cells and cells without any treatment were defined as 100% and 0%, respectively. Triple asterisks indicated  $P < 0.001$ .

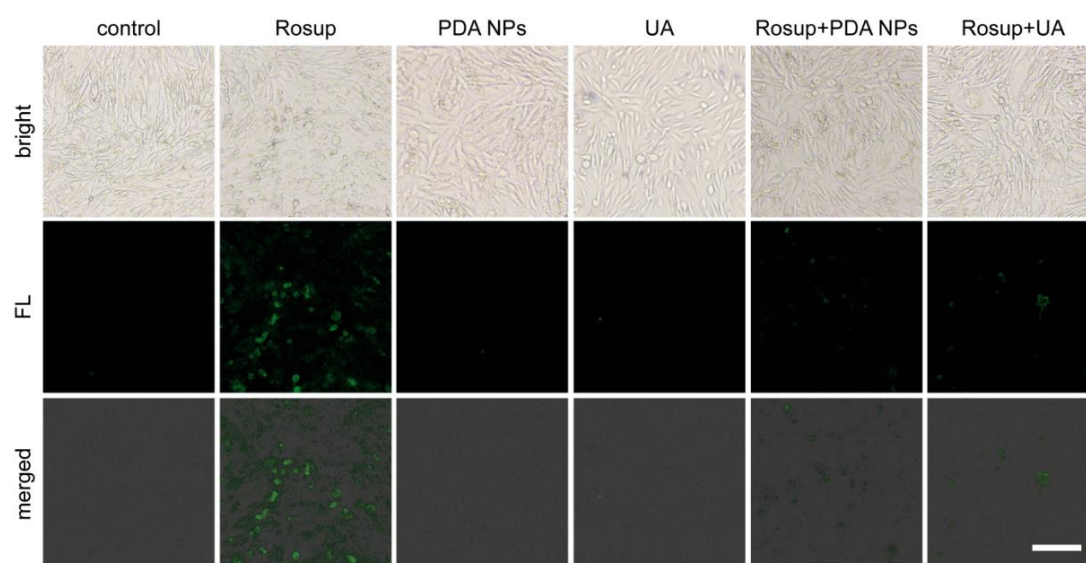

**Figure S5.** Fluorescence images of HGE cells upon various treatments. Scale bar was equal to 100  $\mu\text{m}$ .

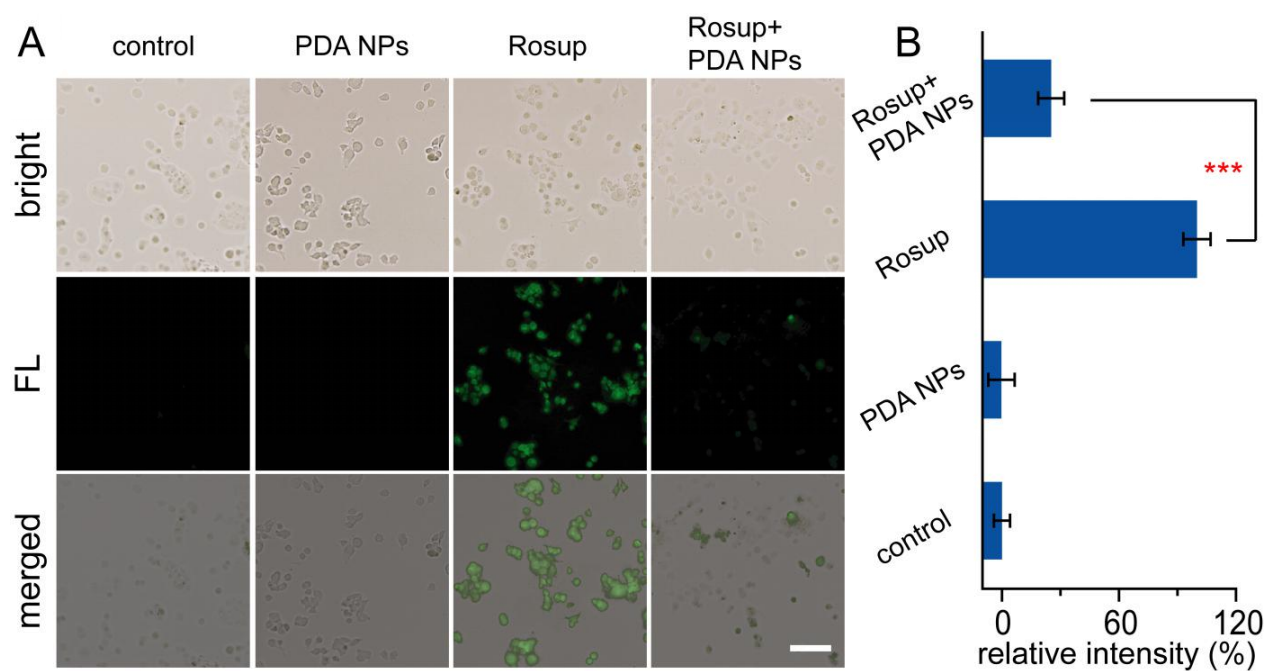

**Figure S6.** (A) Fluorescence images of HeLa cells upon various treatments. Scale bar was equal to 100  $\mu\text{m}$ . (B) Flow cytometry-based quantitative results of PDA NPs as ROS scavengers in HeLa cells. Fluorescence intensities of the Rosup-treated cells and cells without any treatment were defined as 100% and 0%, respectively. Triple asterisks indicated  $P < 0.001$ .

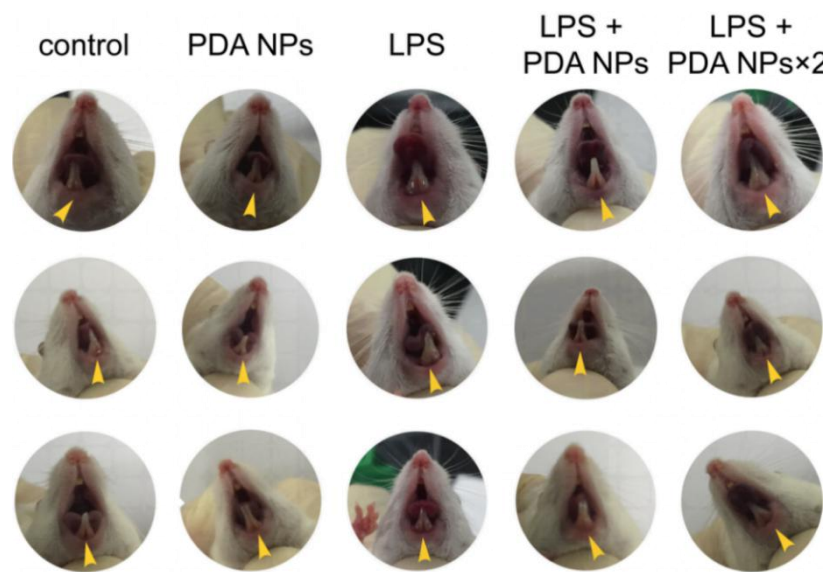

**Figure S7.** Enlarged Figure 4D.



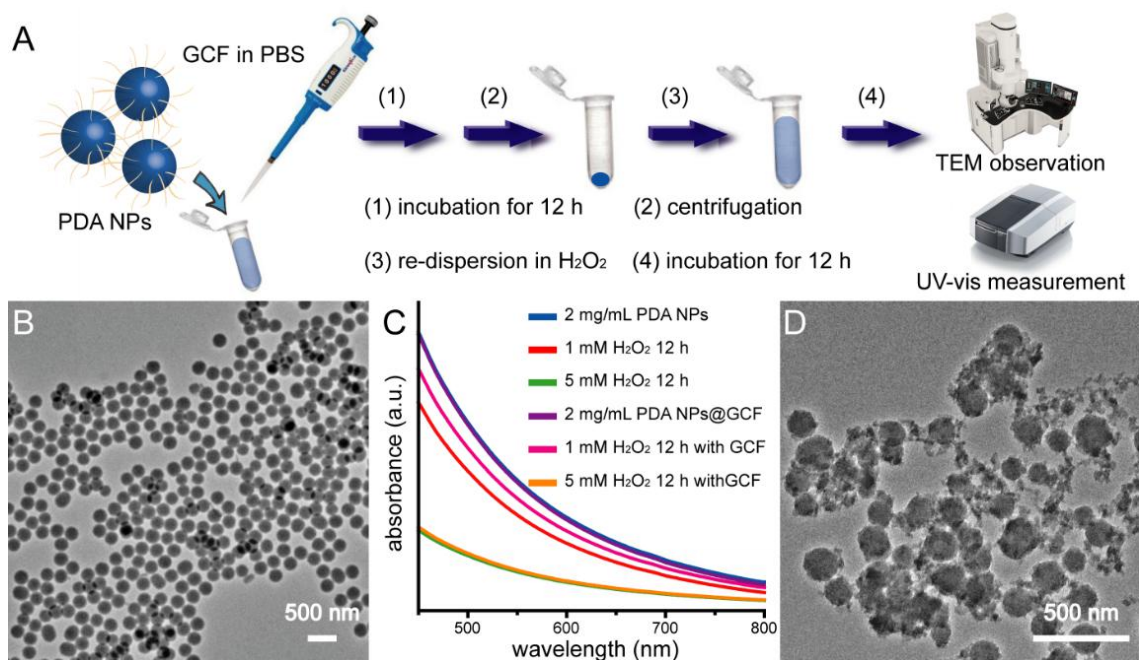

**Figure S8.** (A) Preparation of PDA NPs@GCF and  $\text{H}_2\text{O}_2$ -induced degradation process. (B) TEM image of PDA NPs 12 h after the addition of GCF. (C) UV-vis absorption spectra of solution containing PDA NPs or PDA NPs@GCF after the addition of  $\text{H}_2\text{O}_2$ . (D) TEM image of PDA NPs@GCF 12 h after the addition of  $\text{H}_2\text{O}_2$  with a concentration of 5 mM.

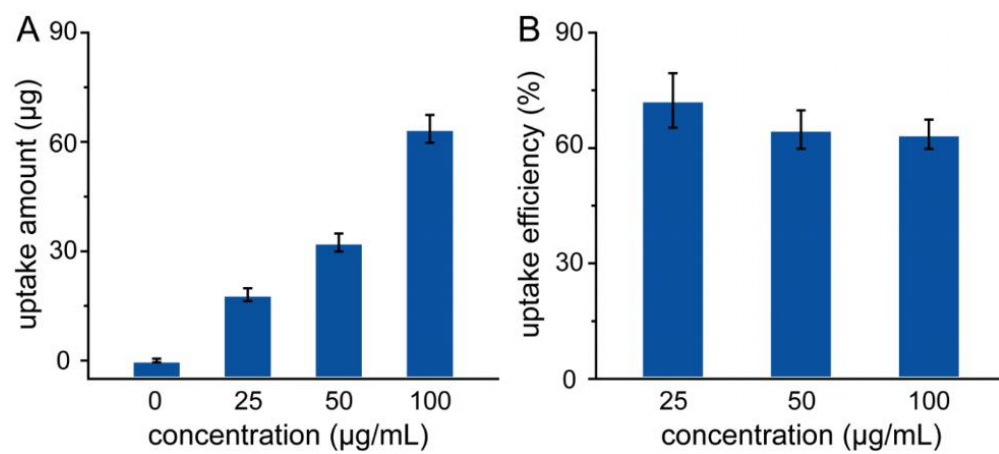

**Figure S9.** (A) Uptake amounts and (B) relative uptake efficiencies of Cu<sup>2+</sup>-modified PDA NPs with different concentrations by Raw 264.7 macrophages. The volumes of culture medium used in the typical experiments were 1 mL.

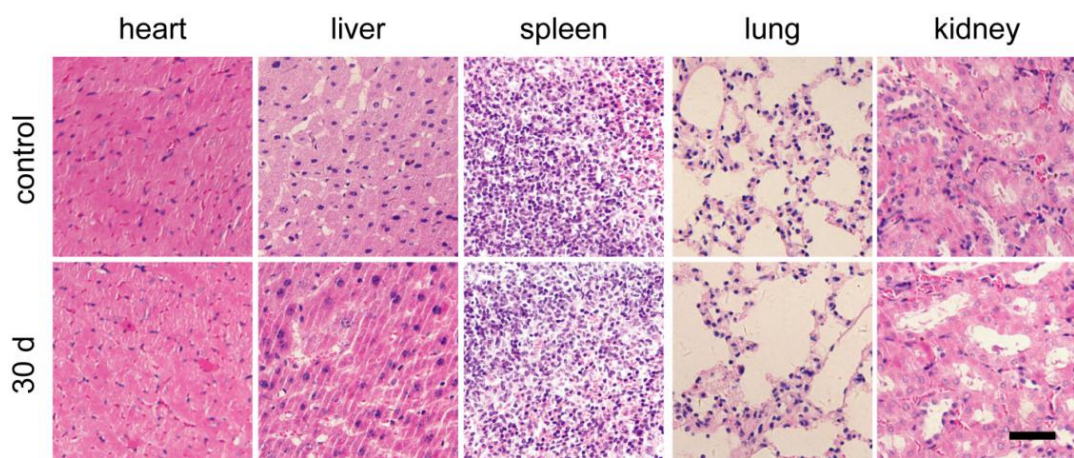

**Figure S10.** Histological images of main organs 30 days post treatments. Mice received subgingival injection of PDA NPs with a dosage of 2 milligrams per site were defined as the test group and mice without any treatment were denoted as the control group. Scale bar was equal to 200  $\mu\text{m}$ .

**Table S1.** Leakage percentages of LDH from HGE cells after coincubation with PDA NPs.

| Concentrations (mg/mL) | Mean leakage percentages of LDH (%) |
|------------------------|-------------------------------------|
| 0                      | 2.67                                |
| 0.03125                | 4.51                                |
| 0.0625                 | 1.17                                |
| 0.125                  | 2.39                                |
| 0.25                   | 3.43                                |
| 0.5                    | 2.38                                |
| 1                      | 4.02                                |

**Table S2.** Exact value of hemolysis percentages after coincubation with PDA NPs.

| Concentrations (mg/mL) | Mean value of hemolysis (%) |
|------------------------|-----------------------------|
| 0.9% NaCl solution     | 0                           |
| water                  | 100                         |
| 0.03125                | 0.1225                      |
| 0.0625                 | 0.19                        |
| 0.125                  | 0.3125                      |
| 0.25                   | 0.07                        |
| 0.5                    | 0.335                       |
| 1                      | 0.2425                      |

**Table S3.** Pathological inflammatory responses of various viscera 30 days after subgingival administration of PDA NPs with a dosage of 2 milligrams per site.

| Samples | Grade of<br>Inflammation | Lymphocytes | Macrophages | Neutrophils | Eosinophils |
|---------|--------------------------|-------------|-------------|-------------|-------------|
| Heart   | Low                      | +-          | +-          | +-          | +-          |
| Liver   | Low                      | +-          | +-          | +-          | +-          |
| Spleen  | Low                      | +-          | +-          | +-          | +-          |
| Lung    | Low                      | +-          | +-          | +-          | +-          |
| Kidney  | Low                      | +-          | +-          | +-          | +-          |

**Table S4.** Pathological inflammatory responses of various viscera 60 days after subgingival administration of PDA NPs with a dosage of 2 milligrams per site.

| Samples | Grade of<br>Inflammation | Lymphocytes | Macrophages | Neutrophils | Eosinophils |
|---------|--------------------------|-------------|-------------|-------------|-------------|
| Heart   | Low                      | +-          | +-          | +-          | +-          |
| Liver   | Low                      | +-          | +-          | +-          | +-          |
| Spleen  | Low                      | +-          | +-          | +-          | +-          |
| Lung    | Low                      | +-          | +-          | +-          | +-          |
| Kidney  | Low                      | +-          | +-          | +-          | +-          |
